# Supplementary material for: A change of culture: reducing blood culture contamination rates in an Emergency Department
Source: PubMed Central journal article supplement — BMJ Qual Improv Rep. 2016 Jun 6;5(1):u206760.w2754. doi: 10.1136/bmjquality.u206760.w2754 (PMC4915310; doi:10.1136/bmjquality.u206760.w2754), 2016-06-06
Supplement: bmjqir.u206760.w2754supp2.pdf [file bmjqir.u206760.w2754supp2.pdf]

## Appendix 1 – Departmental Blood Culture Project Sampling Checklist

# Blood Culture Sampling Checklist

- Clean hands, set up workspace
- Apply tourniquet, palpate vein, clean with e.g. Clinell® (blue) & allow to dry
- Remove caps and clean bottle tops with a Steret® (red) wipe
- Put on gloves (non sterile) - DO NOT REPALPATE THE VEIN

*Fill culture bottles before filling any other types of bottle*

*Fill the green bottle then the red bottle with min 5mls, max 10mls*

*Keep bottles upright during filling*

**Method 1 (safest & least likely to be contaminated):** Use a 12 inch Safety-Lok™ butterfly needle and the blue culture bottle adaptors to aseptically inoculate the bottles directly.

**Method 2:** Use a butterfly or straight needle to draw blood into a syringe then use same needle to inoculate the bottles.

**LAST RESORT:** Blood cultures should only be taken from a cannula which has been newly-inserted. It should be put in the CLINICAL DETAILS of the request form and the blood culture bottles should be filled before any other bottles.

Appendix 2 – Departmental Blood Culture Project Display

Last contamination

Days since last contaminant in  
NW

blood cultures taken

Updated on:

Contaminants = greater harm, inefficiency & cost

# BEWARE

- <15 or >65 years-old
- Poor peripheral access
- Uncooperative

These are the difficult patients so...

## Set-up for Success and TAP BAD

- **T**ake your time
- **A**sk for help
- **P**repare your station and equipment
- **B**lue Clinnell wipes for skin and allow to dry
- **A**void re-palpating site
- **D**ocument any difficulties
